# Supplementary material for: Enhancing metal dispersion over an Mo/ZSM-5 catalyst for methane dehydroaromatization
Source: Royal Society of Chemistry journal article supplement (doi:10.1039/d2qi00694d), 2022-01-01
Supplement: d2qi00694d1.pdf [file d2qi00694d1.pdf]

Supporting Information for

## **Enhancing metal dispersion over Mo/ZSM-5 catalyst for Methane dehydroaromatization**

Pingping Chen<sup>a</sup>, Xiaohui Wang<sup>a</sup>, Rui Yu<sup>a</sup>, Yu Gu<sup>b</sup>, Yuchao Lyu<sup>a</sup>, Yupeng

Tian<sup>a</sup>, Jianye Fu<sup>a</sup>, Xinmei Liu<sup>a,\*</sup>

<sup>a</sup> State Key Laboratory of Heavy Oil Processing, College of Chemical Engineering, China University of Petroleum (East China), Qingdao, 266580, China

<sup>b</sup> College of Chemistry and Chemical Engineering, Yangzhou University, Yangzhou, 225009, China

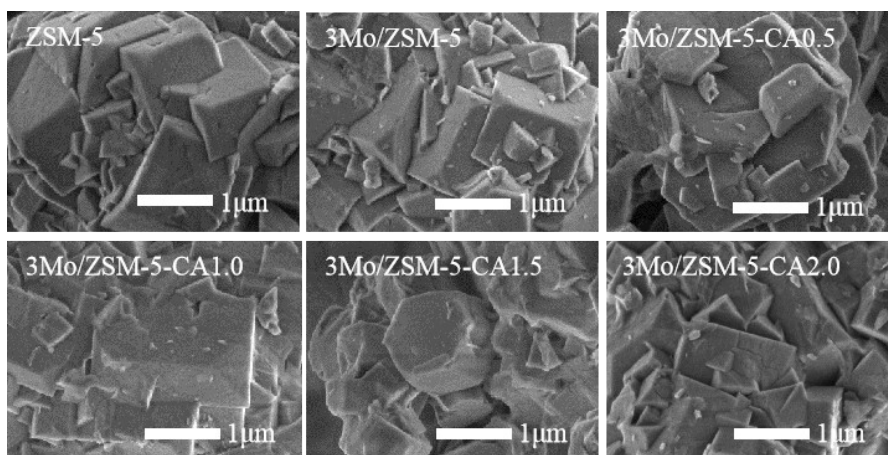

Fig. S1 SEM images of (a) ZSM-5, (b) 3Mo/ZSM-5, (c) 3Mo/ZSM-5-CA0.5, (d) 3Mo/ZSM-5-CA1.0, (e) 3Mo/ZSM-5-CA1.5 and (f) 3Mo/ZSM-5-CA2.0.

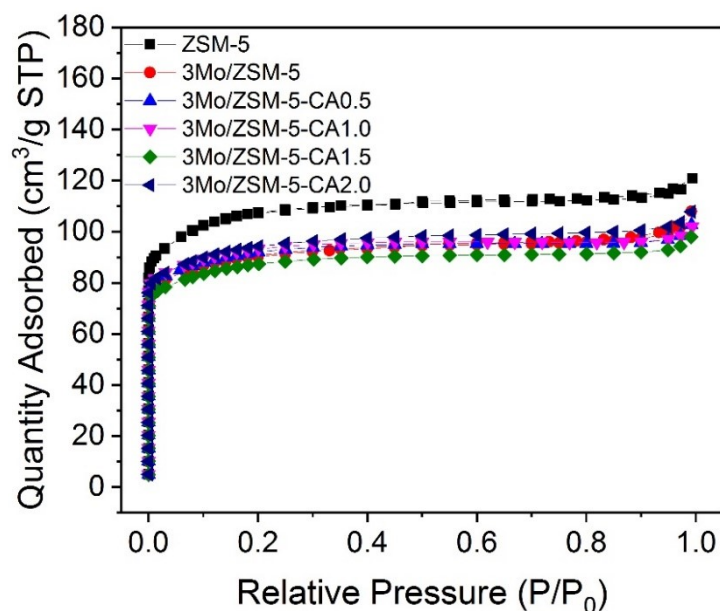

Fig. S2 N<sub>2</sub>-physorption isotherms of ZSM-5, 3Mo/ZSM-5, 3Mo/ZSM-5-CA0.5, 3Mo/ZSM-5-CA1.0, 3Mo/ZSM-5-CA1.5 and 3Mo/ZSM-5-CA2.0.

Table S1 Textural properties and relative crystallinity of the samples

| Samples         | $S_{\text{BET}}^{\text{a}}$<br>( $\text{m}^2 \cdot \text{g}^{-1}$ ) | $S_{\text{micro}}^{\text{b}}$<br>( $\text{m}^2 \cdot \text{g}^{-1}$ ) | $V_{\text{micro}}^{\text{b}}$<br>( $\text{cm}^3 \cdot \text{g}^{-1}$ ) | $V_{\text{total}}$<br>( $\text{cm}^3 \cdot \text{g}^{-1}$ ) | Relative crystallization |
|-----------------|---------------------------------------------------------------------|-----------------------------------------------------------------------|------------------------------------------------------------------------|-------------------------------------------------------------|--------------------------|
| ZSM-5           | 331                                                                 | 224                                                                   | 0.12                                                                   | 0.19                                                        | 100%                     |
| 3Mo/ZSM-5       | 285                                                                 | 198                                                                   | 0.10                                                                   | 0.16                                                        | 91%                      |
| 3Mo/ZSM-5-CA0.5 | 283                                                                 | 197                                                                   | 0.10                                                                   | 0.16                                                        | 95%                      |
| 3Mo/ZSM-5-CA1.0 | 285                                                                 | 202                                                                   | 0.11                                                                   | 0.16                                                        | 95%                      |
| 3Mo/ZSM-5-CA1.5 | 268                                                                 | 186                                                                   | 0.10                                                                   | 0.15                                                        | 98%                      |
| 3Mo/ZSM-5-CA2.0 | 290                                                                 | 197                                                                   | 0.11                                                                   | 0.17                                                        | 91%                      |

<sup>a</sup> BET surface area

<sup>b</sup> t-plot method

Table S2 Band gap energy of samples

| Samples         | $\lambda_g$ (nm) | $E_g$ (eV) |
|-----------------|------------------|------------|
| 3Mo/ZSM-5       | 395              | 3.14       |
| 3Mo/ZSM-5-CA0.5 | 390              | 3.18       |
| 3Mo/ZSM-5-CA1.0 | 388              | 3.20       |
| 3Mo/ZSM-5-CA1.5 | 384              | 3.23       |
| 3Mo/ZSM-5-CA2.0 | 387              | 3.20       |

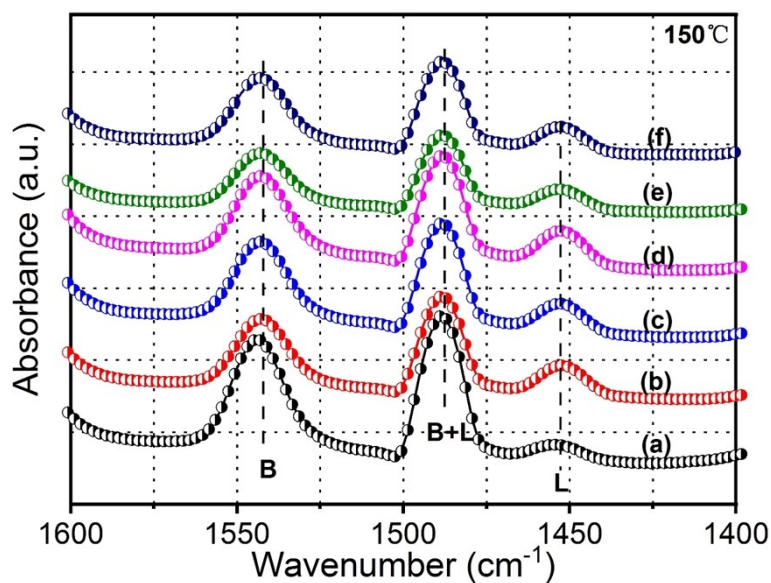

Fig. S3 Py-IR profiles of (a) ZSM-5, (b) 3Mo/ZSM-5, (c) 3Mo/ZSM-5-CA0.5, (d) 3Mo/ZSM-5-CA1.0, (e) 3Mo/ZSM-5-CA1.5 and (f) 3Mo/ZSM-5-CA2.0 (150°C).

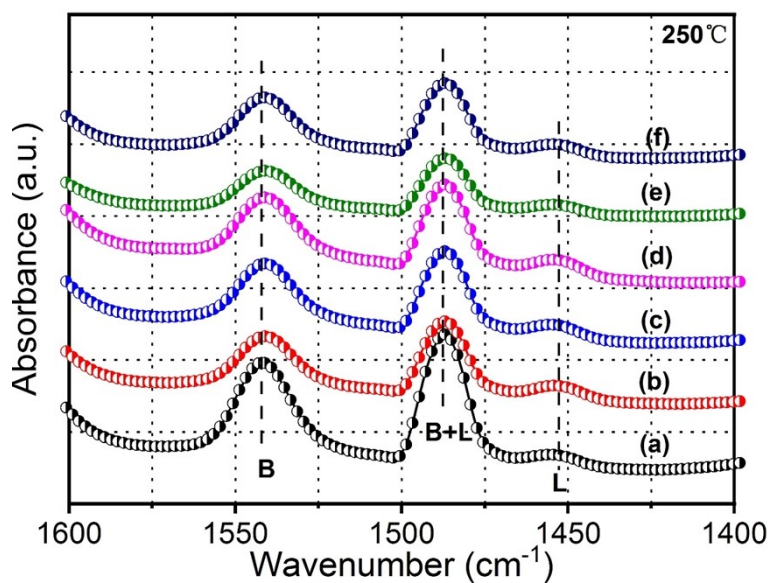

Fig. S4 Py-IR profiles of (a) ZSM-5, (b) 3Mo/ZSM-5, (c) 3Mo/ZSM-5-CA0.5, (d) 3Mo/ZSM-5-CA1.0, (e) 3Mo/ZSM-5-CA1.5 and (f) 3Mo/ZSM-5-CA2.0 (250°C).

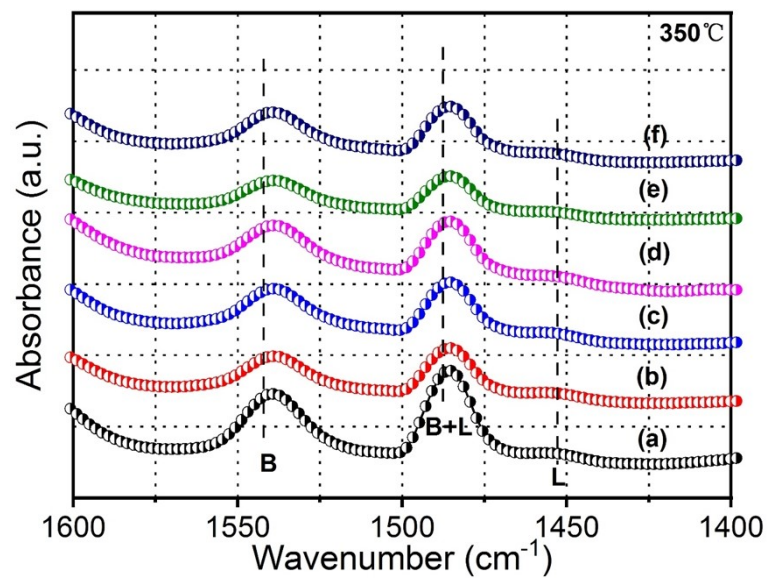

Fig. S5 Py-IR profiles of (a) ZSM-5, (b) 3Mo/ZSM-5, (c) 3Mo/ZSM-5-CA0.5, (d) 3Mo/ZSM-5-CA1.0, (e) 3Mo/ZSM-5-CA1.5 and (f) 3Mo/ZSM-5-CA2.0 (350°C).
